# Supplementary material for: Therapeutic drug monitoring of biopharmaceuticals in inflammatory rheumatic and musculoskeletal disease: a systematic literature review informing EULAR points to consider
Source: HighWire-hosted journal article supplement (doi:10.1136/rmdopen-2022-002216), 2022-06-01
Supplement: rmdopen-2022-002216supp003_data_supplement.pdf [file rmdopen-2022-002216supp003_data_supplement.pdf]

### Online supplementary file 3: risk of bias assessment tables

#### Risk of bias assessment for systematic reviews

For the assessment of the risk of bias of the systematic review, included in our literature search, we used the revised tool of A MeaSurement Tool to Assess systematic Reviews (AMSTAR 2). Table 1 shows the item by item results for the paper of Burmester et al. Each item can be responded to as Yes, Partial yes or No. The overall rating of confidence for this systematic review is low.

**Table 1.: A MeaSurement Tool to Assess systematic Reviews (AMSTAR 2)** (used for Burmester et al. 2017)

| AMSTAR-2    |                                                                                                              | YES | Partial<br>YES | NO |
|-------------|--------------------------------------------------------------------------------------------------------------|-----|----------------|----|
| Item<br>nr. | QUESTION                                                                                                     |     |                |    |
| 1.          | Were components of PICO included in research question and inclusion criteria?                                |     |                | X  |
| 2.          | Was an 'a priori' design provided?                                                                           | X   |                |    |
| 3.          | Was selection of included study designs explained?                                                           | X   |                |    |
| 4.          | Was a comprehensive literature search performed?                                                             |     |                | X  |
| 5.          | Was there duplicate study selection?                                                                         |     |                | X  |
| 6.          | Was there duplicate data extraction?                                                                         |     |                | X  |
| 7.          | Was a list of excluded studies provided inclusive justification of the exclusion?                            |     |                | X  |
| 8.          | Was included studies described in adequate detail?                                                           |     | X              |    |
| 9.          | Was satisfactory technique used for assessing risk of bias in individual studies?                            |     |                | X  |
| 10.         | Was source of funding for included studies reported?                                                         |     | X              |    |
| 11.         | Were appropriate methods used for statistical combination of results?                                        |     | X              |    |
| 12.         | Was the potential impact of risk of bias in individual studies on the results of the meta-analysis assessed? |     |                | X  |
| 13.         | Was risk of bias in individual studies accounted for when interpreting results?                              |     |                | X  |
| 14.         | Was a satisfactory explanation for, and discussion of, any heterogeneity observed being provided?            |     |                | X  |
| 15.         | Was adequate investigation of publication bias performed and likely impact on results discussed?             |     |                | X  |
| 16.         | Were potential sources of conflict of interest (including funding received) reported?                        | X   |                |    |

**Risk of bias assessment of randomised controlled trials**

For the assessment of the risk of bias of RCTs, we used the revised Cochrane Risk of Bias 2 tool (RoB 2 tool). Risk of bias judgement per domain (randomisation process, intended interventions, missing outcome data, measurement of outcome and selection of reported results) are shown in table 2 and are rated as low, some concerns or high. In the last column of this table, the overall risk of bias is shown and this represents the worst domain score.

**Table 2.: revised Cochrane Risk of bias 2 tool for randomized controlled trials (RoB 2 tool)**

| study                                 | Bias arising from the randomisation process | Bias due to deviations from intended interventions | Bias due to missing outcome data | Bias in measurement of outcome | Bias in selection of the reported result | Overall bias  |
|---------------------------------------|---------------------------------------------|----------------------------------------------------|----------------------------------|--------------------------------|------------------------------------------|---------------|
| Goss et al. 2018                      | low                                         | low                                                | low                              | low                            | low                                      | low           |
| Krzysiek et al. 2009                  | low                                         | some concerns                                      | high                             | some concerns                  | low                                      | high          |
| Takeuchi et al. 2009                  | low                                         | low                                                | low                              | low                            | low                                      | low           |
| Ducourau et al. 2020                  | low                                         | some concerns                                      | low                              | high                           | low                                      | high          |
| Abdallah et al. 2017                  | low                                         | low                                                | low                              | low                            | low                                      | low           |
| Burmester et al. 2014                 | low                                         | low                                                | low                              | low                            | low                                      | low           |
| Burmester et al. 2015                 | low                                         | low                                                | low                              | low                            | low                                      | low           |
| Iwahashi et al. 2014                  | some concerns                               | low                                                | low                              | low                            | low                                      | some concerns |
| Ogata et al. 2014                     | low                                         | low                                                | low                              | low                            | low                                      | low           |
| St. Clair et al. 2002                 | low                                         | some concerns                                      | low                              | some concerns                  | low                                      | some concerns |
| Wells et al. 2019                     | low                                         | some concerns                                      | low                              | some concerns                  | low                                      | some concerns |
| Westhovens et al. 2015                | low                                         | low                                                | low                              | low                            | low                                      | Low           |
| Zhuang et al. 2012                    | low                                         | some concerns                                      | low                              | some concerns                  | low                                      | some concerns |
| l'Ami et al. 2018                     | low                                         | some concerns                                      | low                              | some concerns                  | low                                      | some concerns |
| Breedveld et al. 2018                 | low                                         | low                                                | low                              | low                            | low                                      | Low           |
| Inman et al. 2018                     | low                                         | low                                                | low                              | low                            | low                                      | Low           |
| Braun et al. 2008                     | low                                         | low                                                | low                              | some concerns                  | some concerns                            | some concerns |
| Abe et al. 2006                       | low                                         | high                                               | low                              | some concerns                  | high                                     | high          |
| Syversen et al. 2020 (EULAR abstract) | low                                         | high                                               | no information                   | some concerns                  | low                                      | high          |

|                                    |               |      |      |               |     |      |
|------------------------------------|---------------|------|------|---------------|-----|------|
| l'Ami et al. 2020 (EULAR abstract) | some concerns | high | high | some concerns | low | high |
|------------------------------------|---------------|------|------|---------------|-----|------|

### Quality assessment of observational studies

Observational studies that were included in the body of evidence for the evaluation of prognostic factors, were assessed using the Quality in Prognosis Studies tool (QUIPS), see table 3. All other cohort or case-control studies were assessed using the Newcastle-Ottawa scale for observational (cohort or case-control) studies (NOS), see table 4a and 4b.

The QUIPS evaluates six areas for potential bias: participation, attrition, prognostic factor measurement, outcome measurement, study confounding and statistical analysis and reporting. Each area contains several questions to be rated as low, moderate or high. Table 3 summarises the worst score of the questions in each area. A question mark was scored when one or more of the questions in a particular area could not be answered (because of lack of information in the paper under assessment) and none of the other questions in that area were scored high.

With the NOS, a study can be awarded a maximum of one star for each item within the categories of selection (max. 4\*) and outcome/exposure (max. 3\*). Category comparability includes one item that can be rewarded a maximum of two stars.

**Table 3.: Quality In Prognosis Studies tool (QUIPS) (summary rating)**

| study          | Risk of Bias        |                 |                               |                     |                   |                                    |
|----------------|---------------------|-----------------|-------------------------------|---------------------|-------------------|------------------------------------|
|                | study participation | study attrition | prognostic factor measurement | Outcome measurement | Study confounding | Statistical analysis and reporting |
| Arad 2019      | low                 | high            | high                          | low                 | moderate          | moderate                           |
| Arends 2010    | moderate            | high            | high                          | low                 | high              | moderate                           |
| Arstikyte 2015 | high                | high            | high                          | low                 | high              | moderate                           |
| Bartelds 2011  | low                 | moderate        | low                           | low                 | moderate          | low                                |
| Bartelds 2007  | moderate            | moderate        | high                          | low                 | high              | low                                |
| Bastida 2018   | moderate            | high            | low                           | low                 | moderate          | low                                |
| Bouman 2017    | moderate            | moderate        | moderate                      | low                 | high              | low                                |
| Chen 2015 (1)  | high                | ?               | moderate                      | low                 | high              | moderate                           |
| Chen 2015 (2)  | high                | high            | ?                             | low                 | high              | low                                |
| Daïen 2012     | high                | low             | low                           | low                 | high              | low                                |
| Dervieux 2012  | moderate            | ?               | ?                             | low                 | high              | low                                |
| Dong 2019      | moderate            | high            | moderate                      | low                 | high              | moderate                           |
| Ducourau 2011  | low                 | moderate        | high                          | low                 | high              | low                                |
| Eng 2015       | low                 | ?               | ?                             | low                 | high              | moderate                           |
| Eng 2016       | low                 | high            | moderate                      | low                 | high              | moderate                           |
| Gehin 2019     | low                 | high            | low                           | low                 | high              | low                                |

|                       |          |          |          |          |          |          |
|-----------------------|----------|----------|----------|----------|----------|----------|
| Jamnitski 2012        | high     | high     | low      | low      | low      | low      |
| Jani 2015             | moderate | moderate | moderate | moderate | moderate | low      |
| Jani 2017             | low      | moderate | low      | low      | Low      | low      |
| Kneepkens 2015        | moderate | moderate | low      | low      | low      | low      |
| Kneepkens 2014        | moderate | moderate | moderate | moderate | moderate | low      |
| Kneepkens 2015 (2)    | moderate | moderate | moderate | moderate | moderate | low      |
| Marsman 2016          | moderate | high     | moderate | moderate | high     | low      |
| Martinez-Feito 2019   | low      | high     | low      | low      | high     | low      |
| Moots 2017            | moderate | high     | ?        | moderate | high     | low      |
| Mulleman 2011         | moderate | high     | moderate | low      | high     | low      |
| Plasencia 2015        | high     | moderate | moderate | low      | moderate | moderate |
| Pouw 2015             | moderate | high     | low      | low      | high     | low      |
| Rosas 2017            | low      | high     | moderate | low      | high     | moderate |
| Sigaux 2017           | moderate | high     | high     | moderate | high     | moderate |
| Siljehult 2018        | moderate | high     | moderate | moderate | high     | moderate |
| Takeuchi 2017         | high     | high     | high     | low      | high     | moderate |
| Van Kuijk 2010        | high     | high     | moderate | low      | high     | low      |
| Vogelzang 2014        | high     | high     | Low      | low      | moderate | low      |
| Vogelzang 2015        | high     | high     | Low      | low      | high     | low      |
| Wolbink 2006          | moderate | high     | Low      | low      | high     | low      |
| Wolbink 2005          | low      | high     | moderate | low      | moderate | low      |
| Jani 2020             | moderate | high     | high     | low      | high     | low      |
| Paul 2020             | moderate | high     | high     | high     | high     | low      |
| Ding 2020             | moderate | high     | ?        | low      | high     | low      |
| D'Agostino 2017       | low      | high     | ?        | low      | high     | low      |
| Van den Bemt 2013     | low      | high     | ?        | low      | high     | low      |
| Ulijn 2020            | moderate | high     | moderate | high     | high     | low      |
| Vincent 2016          | moderate | moderate | high     | moderate | high     | moderate |
| Plasencia 2013        | moderate | moderate | moderate | low      | moderate | moderate |
| Jamnitski 2011        | low      | low      | moderate | low      | low      | moderate |
| Bartelds 2010         | low      | low      | moderate | low      | low      | low      |
| Bastida 2020          | high     | ?        | moderate | high     | moderate | low      |
| Lamers-Karnebeek 2019 | low      | low      | high     | moderate | high     | low      |
| Chen 2016             | high     | high     | low      | low      | moderate | high     |
| Redondo 2018          | high     | high     | low      | low      | moderate | moderate |

|                                      |          |          |          |          |          |          |
|--------------------------------------|----------|----------|----------|----------|----------|----------|
| L'Ami 2019                           | low      | moderate | moderate | low      | high     | low      |
| Bingham 2009                         | low      | low      | low      | low      | moderate | moderate |
| van der Bijl 2008                    | moderate | low      | high     | low      | high     | moderate |
| Jurado 2017                          | moderate | moderate | moderate | low      | low      | low      |
| Mazilu 2014                          | high     | moderate | moderate | moderate | high     | low      |
| Thurlings 2010                       | high     | high     | high     | high     | high     | moderate |
| Ancuta 2018 (EULAR abstract)         | high     | high     | high     | moderate | high     | high     |
| Martinez-Feito 2019 (EULAR abstract) | high     | high     | high     | low      | moderate | moderate |
| Hooijberg 2019 (EULAR abstract)      | high     | high     | ?        | low      | high     | moderate |
| Stamp 2019 (ACR abstract)            | high     | high     | ?        | low      | ?        | moderate |

**Table 4a.: Newcastle-Ottawa Scale (NOS) for observational (cohort) studies**

| study                      | Risk of Bias |               |         |
|----------------------------|--------------|---------------|---------|
|                            | Selection    | Comparability | Outcome |
| Meric 2011                 | **           | -             | **      |
| Mulleman 2009              | **           | -             | *       |
| Zänker 2018                | *            | -             | *       |
| Jani 2018 (EULAR abstract) | **           | *             | *       |
| Van der Maas 2012          | **           | -             | **      |
| Martinez-Feito 2018        | ***          | **            | **      |
| Mulleman 2010              | **           | -             | *       |
| Rosas 2014                 | **           | -             | *       |
| Senabre 2019               | **           | **            | *       |
| Ducourau 2014              | **           | -             | **      |
| Kneepkens 2017             | ***          | -             | ***     |
| Sanmarti 2015              | ***          | -             | **      |
| Ternant 2015               | **           | -             | **      |
| Van Herwaarden 2015        | ***          | -             | **      |
| Benucci 2016               | ***          | -             | ***     |
| Boumans 2013               | **           | -             | *       |
| Chimenti 2016              | **           | -             | **      |
| De Vries 2009              | ***          | -             | ***     |
| De Vries 2007              | ***          | *             | ***     |
| Finckh 2010                | ***          | *             | *       |
| Inciarte-Mundo 2016        | *            | -             | *       |
| Paramarta 2014             | ***          | -             | **      |
| Pascual-Salcedo 2011       | ***          | -             | **      |

|                                       |     |    |    |
|---------------------------------------|-----|----|----|
| Plasencia 2012                        | *** | -  | ** |
| Radstake 2009                         | *** | -  | ** |
| Gehin 2020 (EULAR abstract)           | **  | ** | ** |
| Senabre-Gallego 2020 (EULAR abstract) | **  | ** | ** |
| Gavan 2018 (EULAR abstract)           | *   | -  | *  |
| Perry 2018 (EULAR abstract)           | *   | -  | ** |

**Table 4b.: Newcastle-Ottawa Scale (NOS) for observational (case-control) studies**

| study                 | Risk of Bias |               |          |
|-----------------------|--------------|---------------|----------|
|                       | Selection    | Comparability | Exposure |
| Bejan-Angoulvant 2017 | *            | **            | *        |
| Bendtsen 2006         | **           | -             | *        |
| Krintel 2013          | **           | -             | *        |
| Bender 2007           | **           | -             | *        |
| Hoxha 2016            | **           | -             | *        |

**Quality assessment of diagnostic studies**

For diagnostic studies, comparing two or more types of assay for biopharmaceutical blood concentration or anti-drug antibodies measurement, the Quality Assessment of Diagnostic Accuracy Studies (QUADAS-2) risk of bias tool was used, see table 5. With QUADAS-2, four key domains (patient selection, index test(s), reference standard and flow and timing) are rated in terms of risk of bias and domains 1-3 are additionally rated for concern regarding applicability to the research question. Domains can be scored low, high or unclear. Each domain contains a set of questions to help reach the judgements.

**Table 5.: Quality Assessment of Diagnostic Accuracy Studies (QUADAS-2) (summary rating)**

| Study                 | Domain 1: patient selection |                                  | Domain 2: index test(s) |                                  | Domain 3: reference standard |                                  | Domain 4: flow and timing |
|-----------------------|-----------------------------|----------------------------------|-------------------------|----------------------------------|------------------------------|----------------------------------|---------------------------|
|                       | Risk of bias                | Concerns regarding applicability | Risk of bias            | Concerns regarding applicability | Risk of bias                 | Concerns regarding applicability | Risk of bias              |
| Alfonso et al. 2016   | low                         | low                              | low                     | low                              | low                          | low                              | low                       |
| Bader et al. 2017     | low                         | low                              | low                     | low                              | low                          | low                              | low                       |
| Bodini et al. 2015    | low                         | low                              | low                     | low                              | low                          | low                              | low                       |
| Bodio et al. 2020     | low                         | low                              | high                    | unclear                          | low                          | low                              | low                       |
| Clarke et al. 2019    | low                         | low                              | low                     | low                              | low                          | low                              | unclear                   |
| Corstjens et al. 2013 | low                         | low                              | low                     | low                              | low                          | low                              | low                       |
| Hock et al. 2019      | low                         | low                              | low                     | low                              | low                          | low                              | low                       |

|                              |         |         |         |         |         |         |         |
|------------------------------|---------|---------|---------|---------|---------|---------|---------|
| Laserna-Mendieta et al. 2019 | low     |
| Martín et al. 2015           | low     | low     | low     | low     | high    | unclear | low     |
| Nasser et al. 2018           | low     | low     | unclear | unclear | low     | low     | low     |
| Novakovic et al. 2019        | low     |
| Steenholdt et al. 2013       | low     | low     | unclear | unclear | low     | low     | low     |
| Steenholdt et al. 2014       | low     | low     | low     | low     | low     | low     | unclear |
| Steenholdt et al. 2015       | low     | low     | low     | low     | low     | low     | unclear |
| Teixeira et al. 2018         | low     | low     | high    | unclear | low     | low     | low     |
| Van Bezooijen et al. 2016    | low     | low     | high    | unclear | high    | unclear | low     |
| Van den Bossche et al. 2016  | low     | low     | low     | low     | low     | low     | unclear |
| Verstockt et al. 2018        | low     | low     | low     | low     | unclear | unclear | low     |
| Willrich et al. 2015         | low     | low     | low     | low     | high    | unclear | low     |
| Yang et al. 2018             | high    | unclear | low     | low     | high    | unclear | low     |
| Real-Fernández et al. 2019   | low     |
| Ogrič et al. 2019            | unclear | low     | low     | low     | low     | low     | low     |

### Quality assessment economic evaluations

Methodological quality of the economic evaluations included in the body of evidence was assessed using the Consensus on Health Economic Criteria (CHEC) list, see table 6. This tool consists of nineteen items comprising specific criteria that have reached consensus as a generic core set of items for the quality assessment of economic evaluations. When information was clearly described in the paper (including supplementary materials) the item was scored 'yes', in case of insufficiently available information, the item is scored 'no'.

**Table 6.: Consensus on Health Economic Criteria (CHEC)**

| Item nr. | QUESTION                                      | Included studies       |    |                  |     |                   |    |
|----------|-----------------------------------------------|------------------------|----|------------------|-----|-------------------|----|
|          |                                               | Krieckaert et al. 2015 |    | Jani et al. 2016 |     | Laine et al. 2016 |    |
|          |                                               | YES                    | NO | YES              | NO  | YES               | NO |
| 1.       | Is the study population clearly described?    |                        | X  |                  | N/A |                   | X  |
| 2.       | Are competing alternatives clearly described? | X                      |    |                  | N/A |                   | X  |

|     |                                                                                                                 |   |   |   |     |   |   |
|-----|-----------------------------------------------------------------------------------------------------------------|---|---|---|-----|---|---|
| 3.  | Is a well-defined research question posed in answerable form?                                                   | X |   | X |     | X |   |
| 4.  | Is the economic study design appropriate to the stated objective?                                               | X |   | X |     | X |   |
| 5.  | Is the chosen time horizon appropriate in order to include relevant costs and consequences?                     | X |   |   | N/A | X |   |
| 6.  | Is the actual perspective chosen appropriate?                                                                   | X |   | X |     |   | X |
| 7.  | Are all important and relevant costs for each alternative identified?                                           |   | X | X |     | X |   |
| 8.  | Are all costs measured appropriately in physical units?                                                         | X |   | X |     |   | X |
| 9.  | Are costs valued appropriately?                                                                                 |   | X |   | X   | X |   |
| 10. | Are all important and relevant outcomes for each alternative identified?                                        | X |   | X |     |   | X |
| 11. | Are all outcomes measured appropriately?                                                                        | X |   |   | N/A |   | X |
| 12. | Are outcomes valued appropriately?                                                                              | X |   |   | N/A |   | X |
| 13. | Is an incremental analysis of costs and outcomes of alternatives performed?                                     | X |   |   | X   |   | X |
| 14. | Are all future costs and outcomes discounted appropriately?                                                     | X |   |   | X   |   | X |
| 15. | Are all important variables, whose values are uncertain, appropriately subjected to sensitivity analysis?       |   | X | X |     |   | X |
| 16. | Do the conclusions follow from the data reported?                                                               | X |   | X |     | X |   |
| 17. | Does the study discuss the generalizability of the results to other settings and patient/client groups?         | X |   |   | X   |   | X |
| 18. | Does the article indicate that there is no potential conflict of interest of study researcher(s) and funder(s)? | X |   | X |     |   | X |
| 19. | Are ethical and distributional issues discussed appropriately?                                                  |   | X |   | X   |   | X |
